# Supplementary material
Source: MDPI journal article supplement (https://www.mdpi.com/2073-4441/15/6/1231)
Supplement: s1 [file s1]

# **Applying linear forms of pseudo-second-order kinetic model for=** **feasibly identifying errors in the initial periods of time-** **dependent adsorption datasets**

Hai Nguyen Tran 1,2\*

<sup>1</sup>Center for Energy and Environmental Materials, Institute of Fundamental and Applied= Sciences, Duy Tan University, Ho Chi Minh, 700000, Viet Nam

<sup>2</sup>Faculty of Environmental and Chemical Engineering, Duy Tan University, Da Nang,= 550000, Viet Nam

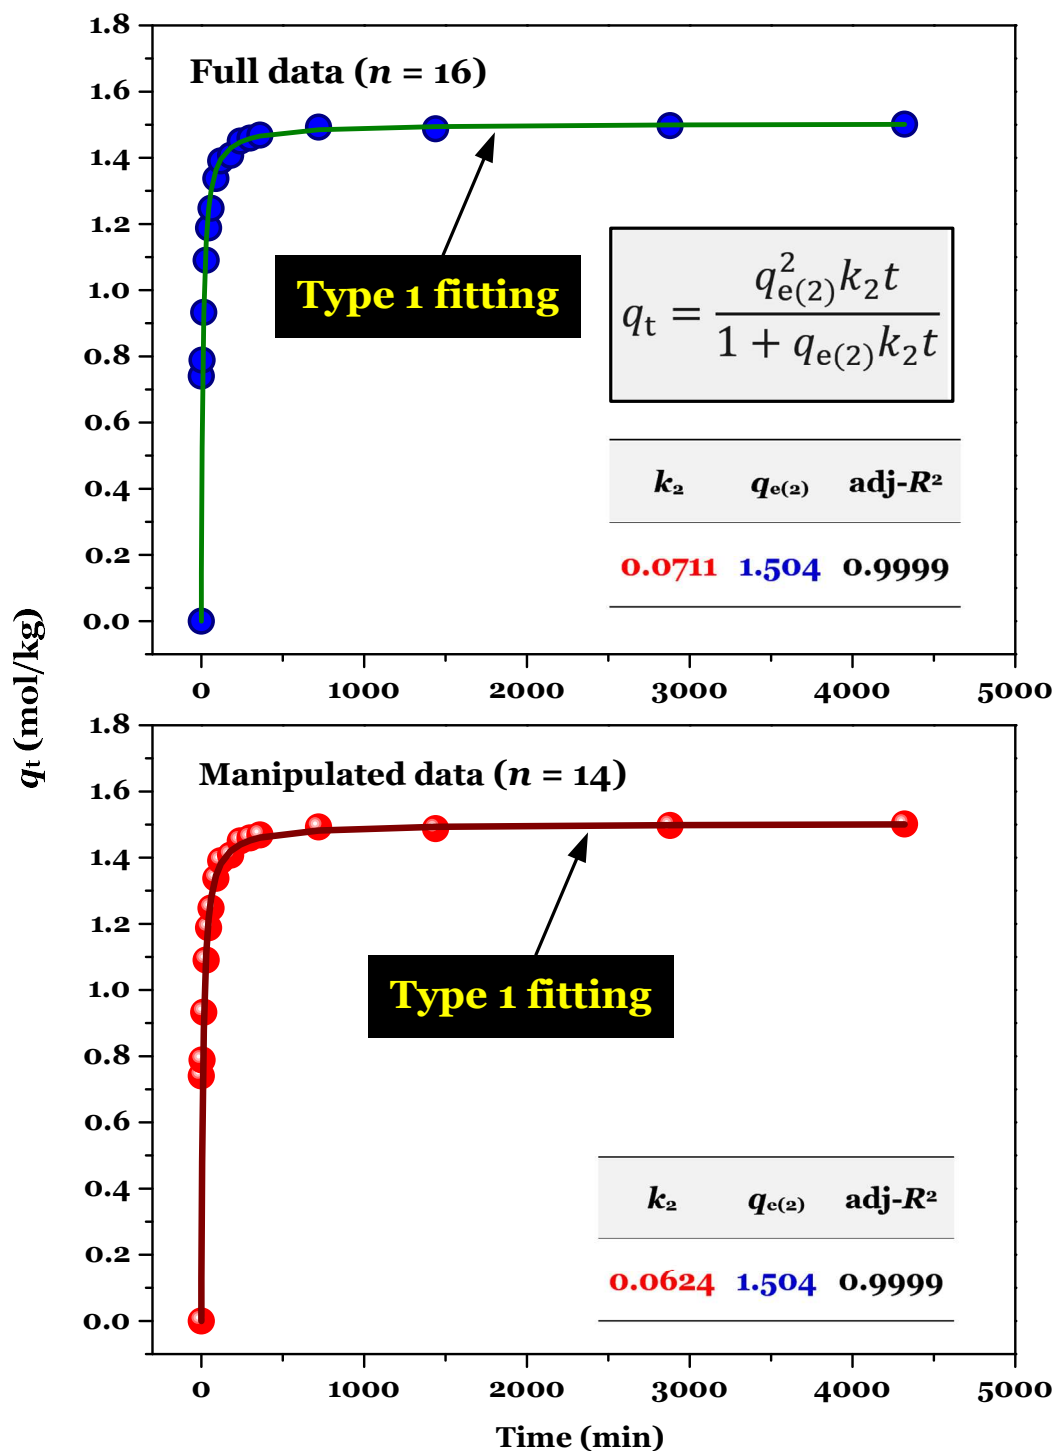

**Figure S1.** Physical fitting lines of the experimental data of kinetic adsorption by the linear form (Type 1) of the PSO model

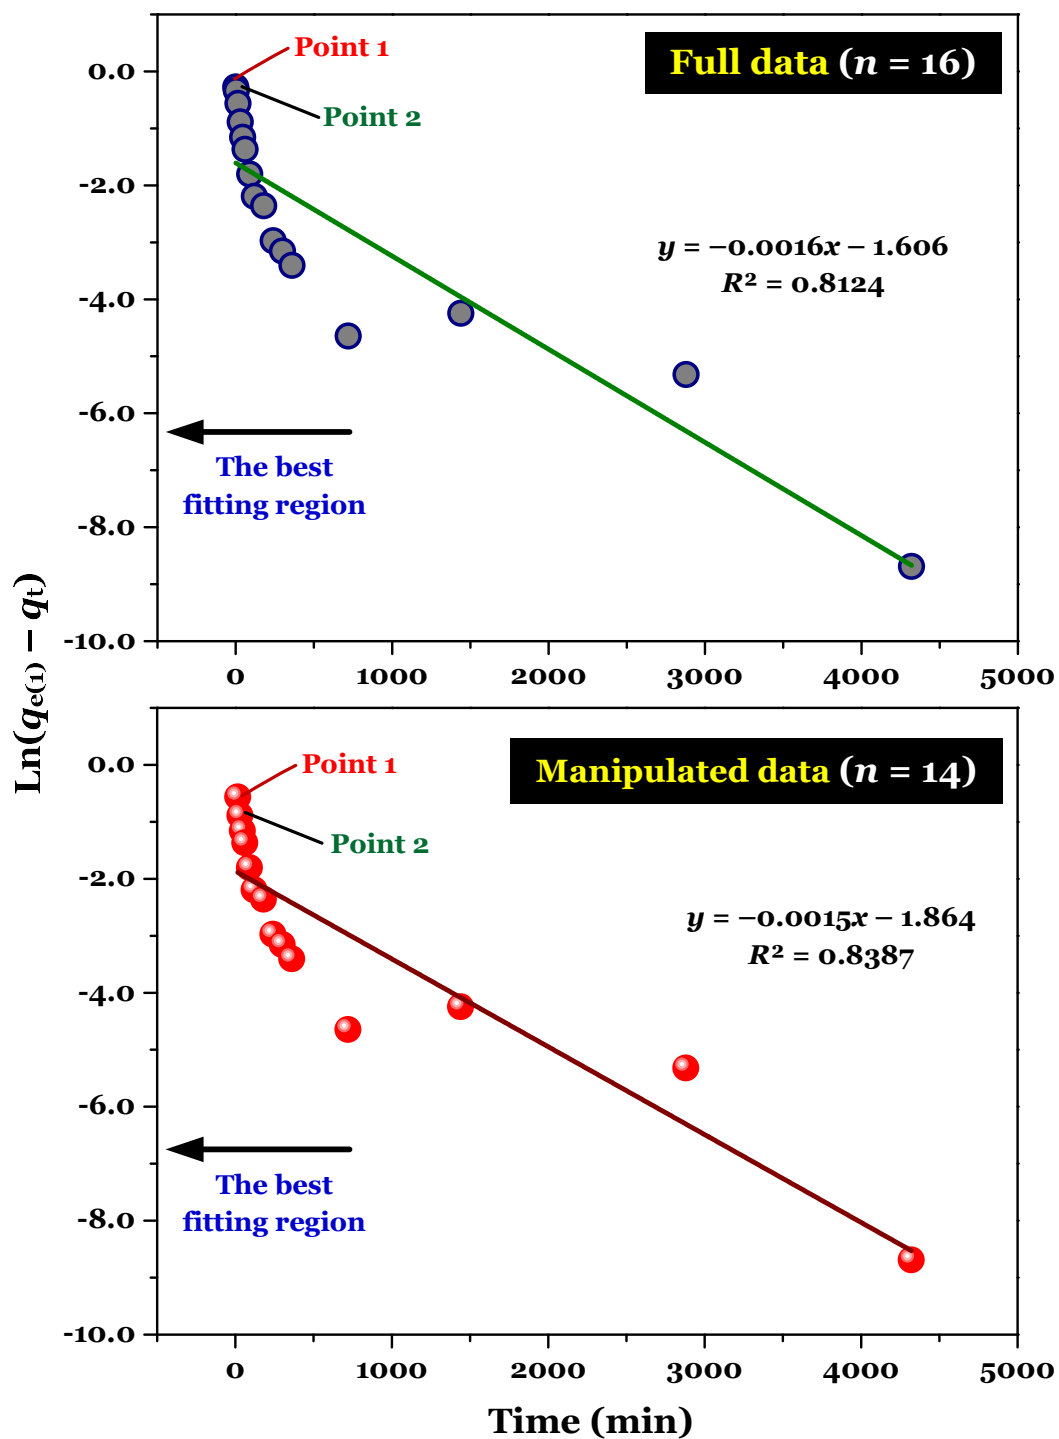

**Figure S2.** The linear plot of PFO model obtained by considering the full data ( $n = 16$ ) and the manipulated data ( $n = 14$ )

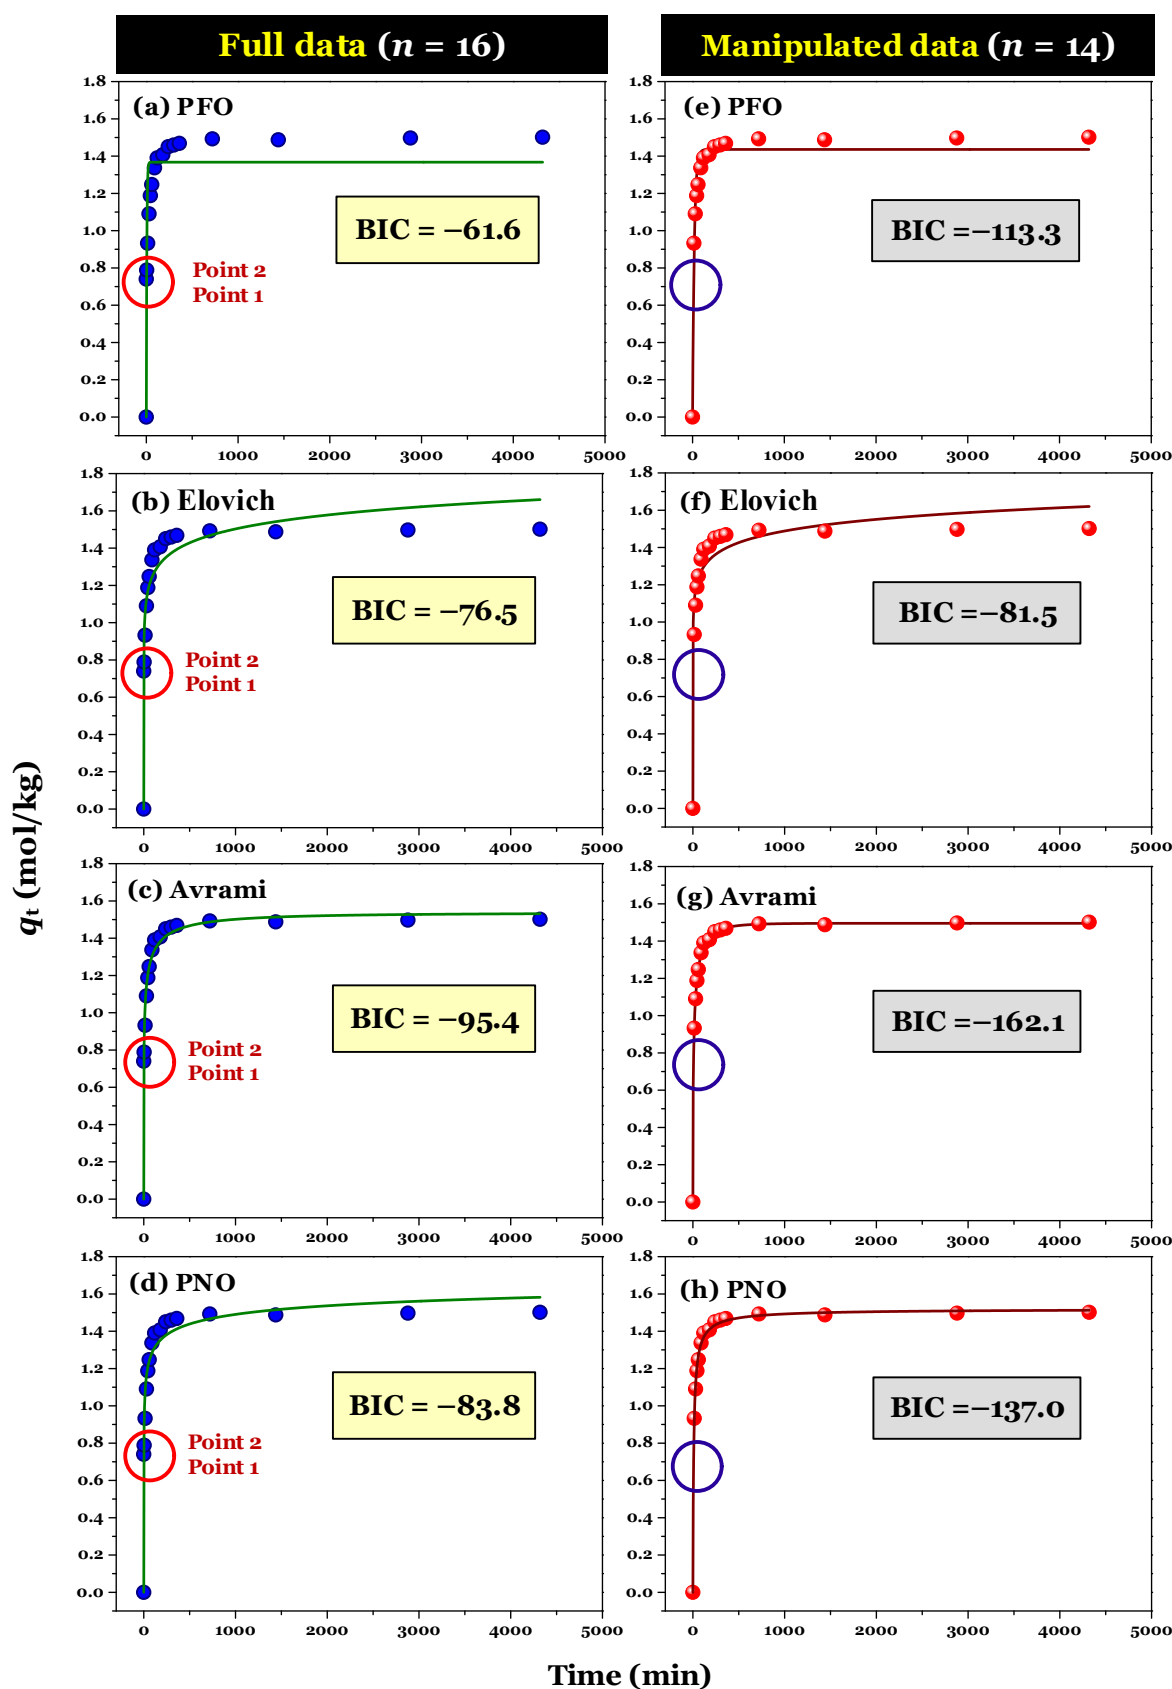

**Figure S3.** Adsorption kinetic of paracetamol by commercial activated carbon fitted by various adsorption kinetic models: (a)–(d) full data and (e)–(h) manipulated data (after removing Points 1 and 2)

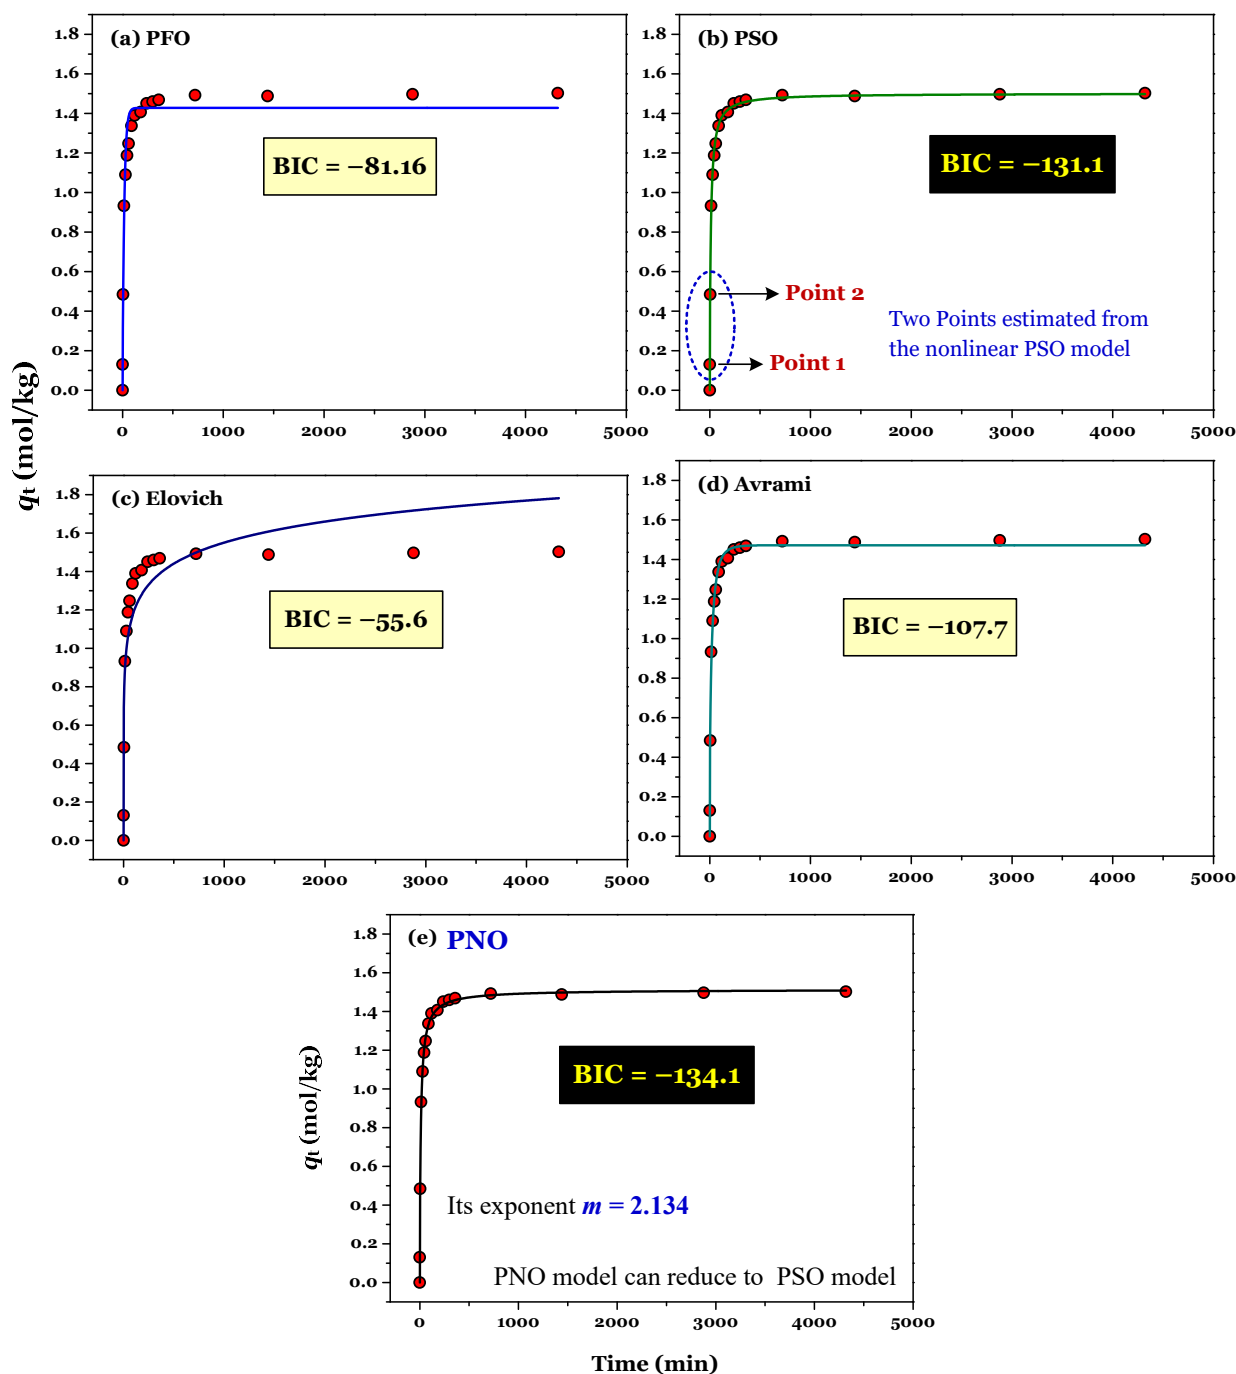

**Figure S4.** Re-modelling adsorption kinetics after submitting the Point 1 ( $q_t = 0.131$  mol/kg) and Point 2 (0.484 mol/kg) estimated from the PSO model to the datasets (Note: the modelling results for the case of the revisited data are provided in **Table 2**)

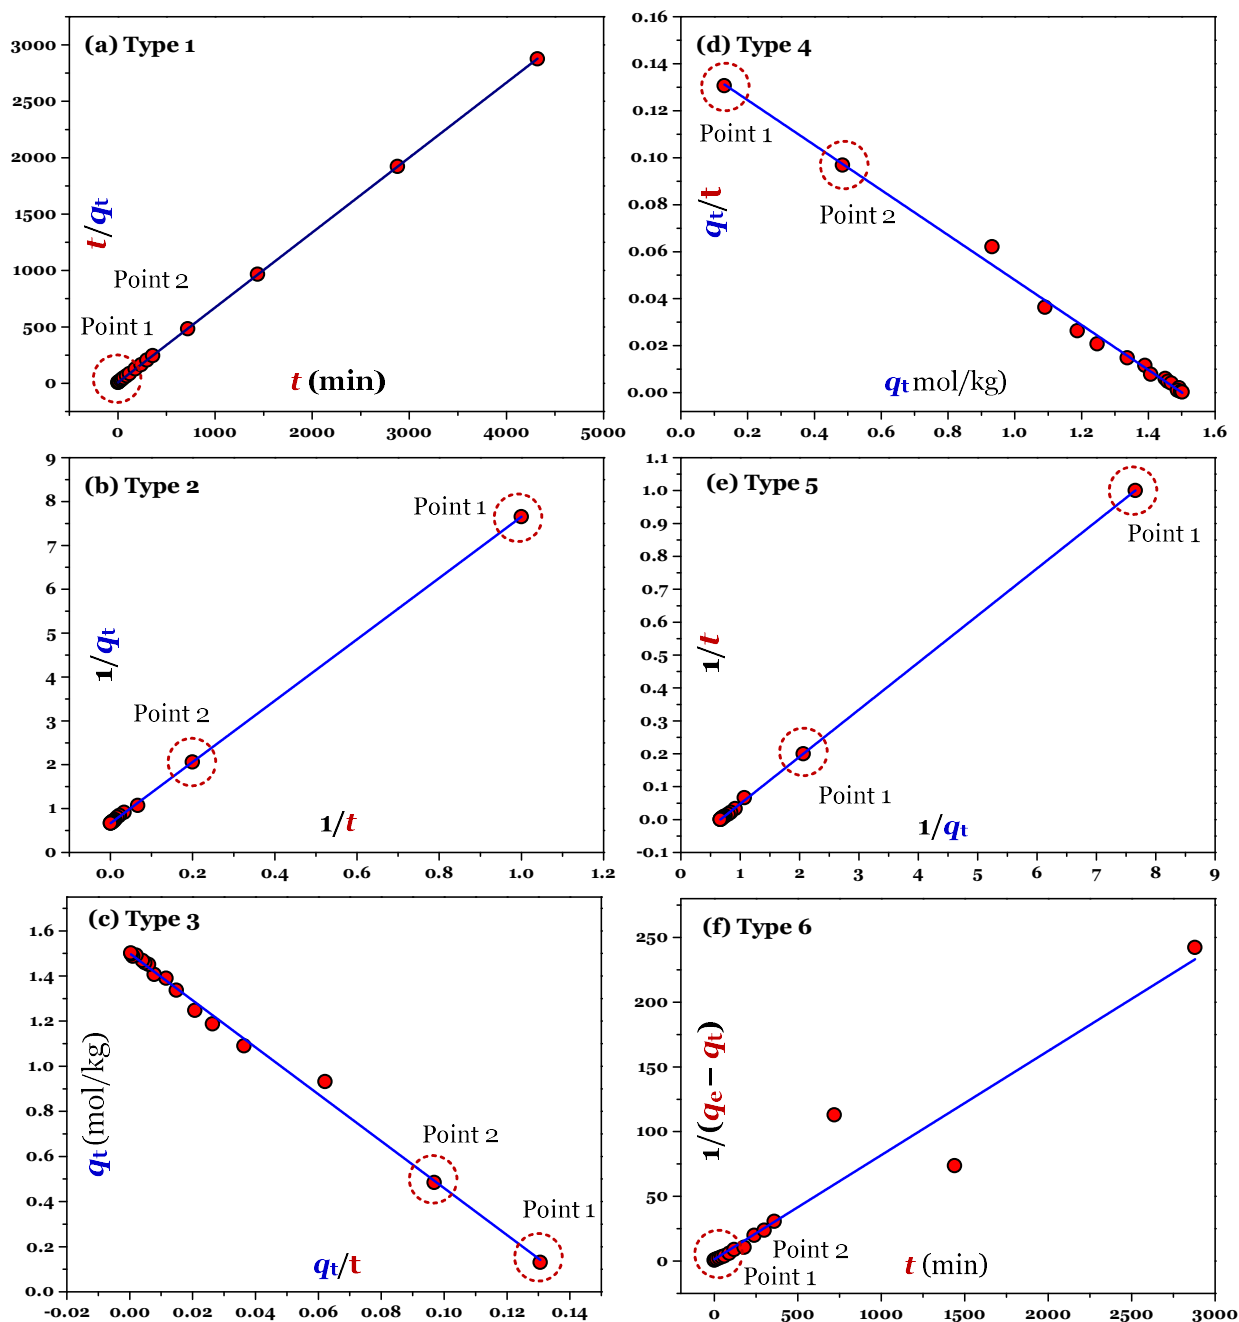

**Figure S5.** Re-modelling results using the six linear forms of the PSO model after submitting the Point 1 (0.131 mol/kg) and Point 2 (0.484 mol/kg) estimated from the PSO model to the datasets six (Note: the modelling results for the case of the revisited data are provided in **Table 1**)
